# Supplementary material for: Physician and Nurse Acceptance of Technicians to Screen for Geriatric Syndromes in the Emergency Department
Source: PubMed Central journal article supplement — West J Emerg Med. 2011 Nov;12(4):489–95. doi: 10.5811/westjem.2011.1.1962 (PMC3236152; doi:10.5811/westjem.2011.1.1962), 2011-11
Supplement: wjem-12-04-489-s1.pdf [file wjem-12-04-489-s1.pdf]

## The Geriatric Technician Survey

Over the last 8-months, a research assistant has been screening geriatric patients in the emergency department (ED) in regards to a number of clinical questions: occult dementia, fall-risk, functional decline, and frailty. We have labeled this research assistant a “Geriatric Technician”. During this period, you received several e-mail notifications of these screening efforts. You may have encountered the research assistants while caring for patients. The objective of this survey is to anonymously assess the nursing staff opinion regarding the potential role for the Geriatric Technician in the ED. For the purpose of these questions, assume that the Geriatric Technician is cost-neutral to the ED budget.

### Question 1

Do you believe having a Geriatric Technician, dedicated to screening older adults for geriatric syndromes would be an overall benefit to patients?

YES            NO            Uncertain

### Question 2

If you answered **no or uncertain**, please circle all applicable reasons for this response:

Screening may not be within the realm of emergency medicine (EM)

Screening is already being performed by EM physicians or nurses

Screening will delay ED throughput

Screening will not significantly improve outcomes in this population

Screening is too costly and could never be cost-effective

Screening is too invasive for the patient or family

Other: \_\_\_\_\_

For the following questions please completely fill in the bubble adjacent to the response that most closely approximates your opinion across the gradient of possibilities.

Example:

I like snow in the winter.

Strongly Disagree

Disagree

Neutral

Agree

Strongly Agree

### Question 3

Please rate the **overall difficulty in implementing** a full-time ED Geriatric Technician within the routine care of your patients:

Not Difficult at all  
to Implement

Neutral

Extremely  
Difficult to  
Implement

What difficulties do you foresee?

---

### Question 4

Very Positive  
Effect on Patient  
Care

Neutral

Very Negative  
Effect on Patient  
Care

If negative, why?

---

### Question 5

Please rate the potential impact of an ED Geriatric Technician on **patient care**:

Very Positive                                      Neutral                                      Very Negative  
 Effect on Patient                                      Effect on Patient  
 Care                                      Care

If negative, why?

---

### Question 6

In your emergency care of adults over age 65 years, do you routinely (>50% of patient encounters) perform any of the following assessments **using validated screening tools**?

|                              |     |    |
|------------------------------|-----|----|
| Prognosis                    | YES | NO |
| Fall risk                    | YES | NO |
| Dementia screen              | YES | NO |
| Visual acuity                | YES | NO |
| Auditory acuity              | YES | NO |
| Polypharmacy screening       | YES | NO |
| Formal functional assessment | YES | NO |
| Immunization status          | YES | NO |

If you do not use validated screening tools, why not? \_\_\_\_\_

### Question 7

Geriatric technician screening significantly slowed the care of my older adult patients impeding ED throughout.

YES                      NO

### Question 8

How many post-residency years have you been a practicing emergency physician? (physicians)

How many years have you been a practicing nurse? (nurses)

<1 year                      1–5 years                      6–10 years                      >10 years
